# Supplementary material for: In situ self-foaming preparation of hydrophobic polyurethane foams for oil/water separation
Source: Royal Society of Chemistry journal article supplement (doi:10.1039/d0nj05208f), 2021-01-01
Supplement: d0nj05208f1.pdf [file d0nj05208f1.pdf]

## Supporting Information

### **In-situ self-foaming preparation of hydrophobic polyurethane foam for oil/water separation**

Leiyi Fan<sup>a,b</sup>, Rui Wang<sup>b</sup>, Qian Zhang<sup>b</sup>, Shuaizhuo Liu<sup>b</sup>, Ruijie He<sup>b</sup>, Ruiyang Zhang<sup>b</sup>,  
Min Shen<sup>b</sup>, Xin Xiang<sup>b</sup>, Ying Zhou<sup>a,b,\*</sup>

<sup>a</sup> State Key Laboratory of Oil and Gas Reservoir Geology and Exploitation,  
Southwest Petroleum University, Chengdu 610500, China

<sup>b</sup> The Center of New Energy Materials and Technology, School of New Energy and  
Materials, Southwest Petroleum University, Chengdu 610500, China

\* Corresponding author. Tel: +028-83037401; Fax: +86-28-83037406; E-mail:

yzhou@swpu.edu.cn

# Content

|                                                                                                                                                                                                                                                    |    |
|----------------------------------------------------------------------------------------------------------------------------------------------------------------------------------------------------------------------------------------------------|----|
| <b>Table S1</b> Proportion of foaming raw materials .....                                                                                                                                                                                          | 1  |
| <b>Table S2</b> Comparison of adsorption capacity and cycle performance between various materials ...                                                                                                                                              | 2  |
| <b>Scheme S1</b> Schematic diagram of in-situ foaming for preparing the polyurethane foam.....                                                                                                                                                     | 3  |
| <b>Fig. S1</b> Schematic diagram of the molecular structure of polyether N330(a), polyether N220(b), and polyether PTMG(c).....                                                                                                                    | 4  |
| <b>Fig. S2</b> <sup>1</sup> H NMR spectrum of PU-N330 .....                                                                                                                                                                                        | 5  |
| <b>Fig. S3</b> <sup>1</sup> H NMR spectrum of PU-N220 .....                                                                                                                                                                                        | 6  |
| <b>Fig. S4</b> <sup>1</sup> H NMR spectrum of PU-PTMG .....                                                                                                                                                                                        | 7  |
| <b>Fig. S5</b> Pore distribution of (a) PU-N330, (b) PU-N220 and (c) PU-PTMG .....                                                                                                                                                                 | 8  |
| <b>Fig. S6</b> Absorption for static surface oil slick (a) and dynamic surface oil slick (b) over PU-PTMG                                                                                                                                          | 9  |
| <b>Fig. S7</b> Absorption for static underwater sinking oil over PU-PTMG .....                                                                                                                                                                     | 10 |
| <b>Fig. S8</b> Continuous separation for static surface oil slick (a) and dynamic surface oil slick (b) over PU-PTMG .....                                                                                                                         | 11 |
| <b>Fig. S9</b> Continuous separation for emulsion (a), the comparison diagram before and after separation over PU-PTMG (b) .....                                                                                                                   | 12 |
| <b>Fig. S10</b> UV test chart of surfactant-free emulsion after separation by PU-PTMG under different conditions .....                                                                                                                             | 13 |
| <b>Fig. S11</b> UV test chart of cationic surfactant stabilized emulsion after separation by PU-PTMG under different conditions .....                                                                                                              | 14 |
| <b>Fig. S12</b> UV test chart of anionic surfactant stabilized emulsion after separation by PU-PTMG under different conditions .....                                                                                                               | 15 |
| <b>Fig. S13</b> UV test charts of surfactant-free emulsion (a), cationic surfactant stabilized emulsion (b), anion surfactant stabilized emulsion (c) and the separation efficiencies of emulsions (d) by PU-N330 under different conditions ..... | 16 |
| <b>Fig. S14</b> UV test charts of surfactant-free emulsion (a), cationic surfactant stabilized emulsion (b), anion surfactant stabilized emulsion (c) and the separation efficiencies of emulsions (d) by PU-N220 under different conditions ..... | 17 |
| <b>Fig. S15</b> Water contact angle of block polyurethane foam.....                                                                                                                                                                                | 18 |
| <b>References</b> .....                                                                                                                                                                                                                            | 19 |

**Table S1** Proportion of foaming raw materials

| Raw materials        | Mass ratio (%) |
|----------------------|----------------|
| Polyether polyol     | 100            |
| H <sub>2</sub> O     | 5.25           |
| Dichloromethane      | 10.26          |
| Stannous octoate     | 0.28           |
| Triethylene diamine  | 0.32           |
| Silicone oil (L-580) | 2              |
| Polyether additives  | 1              |

Note: Taking the mass of polyether polyol as the reference.

The dosage of toluene diisocyanate is calculated by the following formula.

$$W_{TDI} = G \times \left( \frac{W_{OH} \times OHV}{56.1 \times 1000} + \frac{W_{H_2O}}{9} \right) \times R \times \frac{1}{P}$$

Where,  $W_{TDI}$  represents the quality of toluene diisocyanate.  $G$  is the equivalent value of toluene diisocyanate, and the specific value is 87.  $W_{OH}$  represents the added amount of polyether polyol,  $OHV$  represents the hydroxyl value in polyether,  $W_{H_2O}$  represents the mass of water.  $R$  represents the use index of toluene diisocyanate, which is 1.2 in this study.  $P$  is the purity of toluene diisocyanate (98%).

**Table S2** Comparison of adsorption capacity and cycle performance between various materials

| Sample name                 | $Q_{wt}(g\ g^{-1})$ | Cycles | Cycle stability | Reference |
|-----------------------------|---------------------|--------|-----------------|-----------|
| Silane-f-rGONR@PU           | 30-68               | 10     | 97%             | [1]       |
| PU-CNT-PDA                  | 22-34.9             | 150    | 86%             | [2]       |
| PU-TiO <sub>2</sub> -GO-TDA | 20.2-62.4           | 20     | 90%             | [3]       |
| ZnO-PU                      | 33-44               | 95     | Stable          | [4]       |
| GN-PU                       | 28-47               | 100    | Stable          | [5]       |
| LPU-rGO-ODA                 | 26-68               | 20     | Stable          | [6]       |
| PPy-PA sponge               | 22-62               | 10     | Slightly lower  | [7]       |
| Pure PU foam                | < 6                 | -      | -               | [8]       |
| Mg-Al PF/PU composite       | 5.1-11.6            | 10     | Stable          | [8]       |
| PU-PTMG                     | 53.0-75.0           | 200    | Stable          | This work |

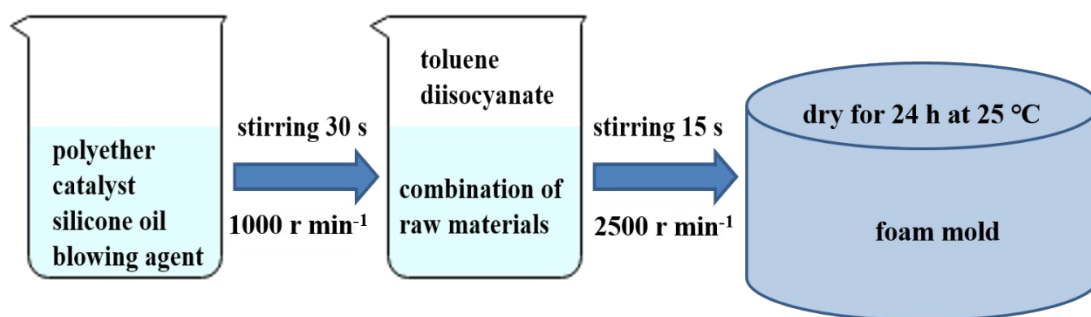

**Scheme S1** Schematic diagram of in-situ foaming for preparing the polyurethane foam

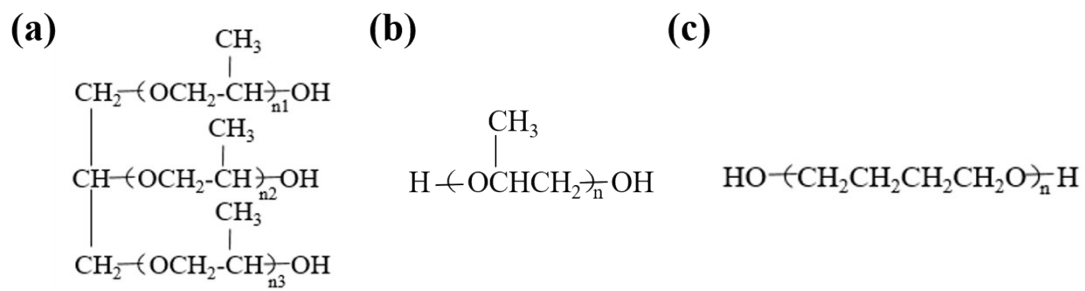

**Fig. S1** Schematic diagram of the molecular structure of polyether N330(a), polyether N220(b), and polyether PTMG(c)

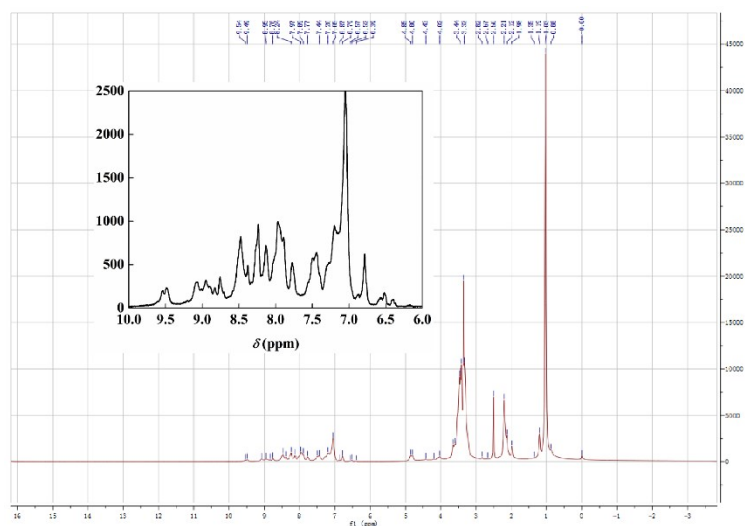

**Fig. S2** <sup>1</sup>H NMR spectrum of PU-N330

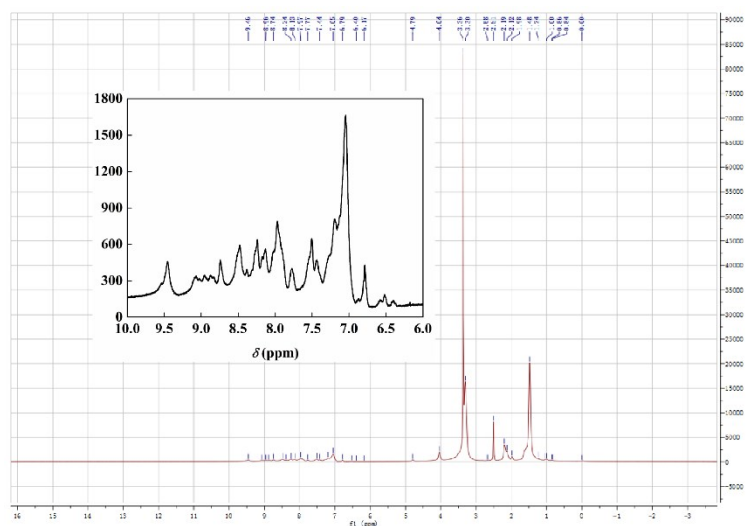

**Fig. S3** <sup>1</sup>H NMR spectrum of PU-N220



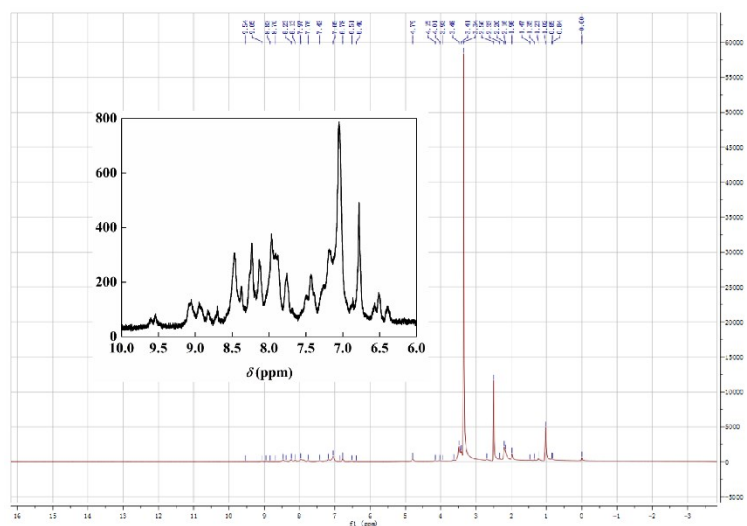

**Fig. S4** <sup>1</sup>H NMR spectrum of PU-PTMG

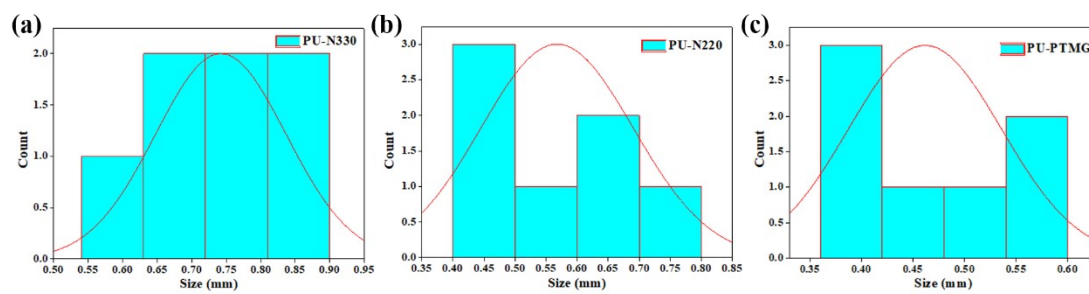

**Fig. S5** Pore distribution of (a) PU-N330, (b) PU-N220 and (c) PU-PTMG

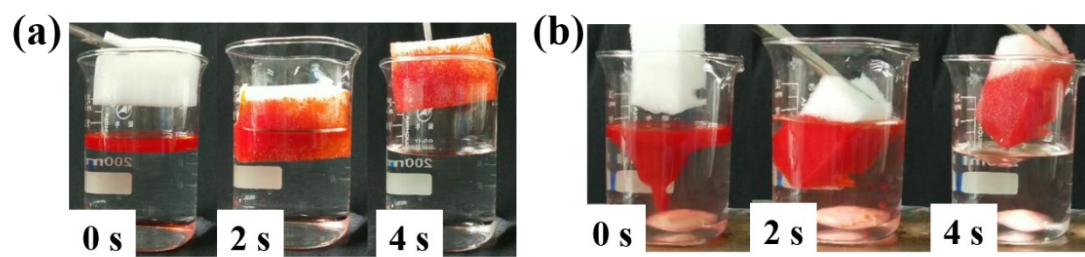

**Fig. S6** Absorption for static surface oil slick (a) and dynamic surface oil slick (b) over PU-PTMG

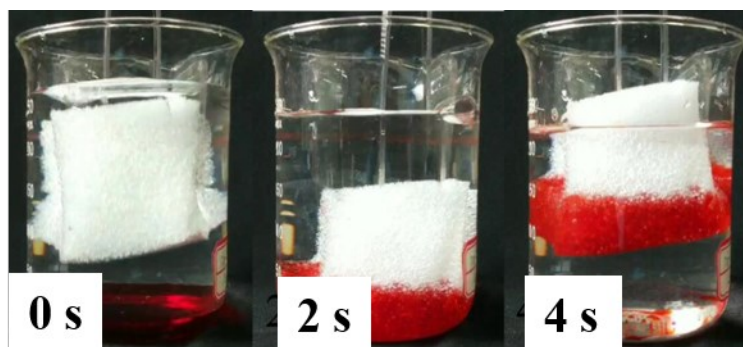

**Fig. S7** Absorption for static underwater sinking oil over PU-PTMG

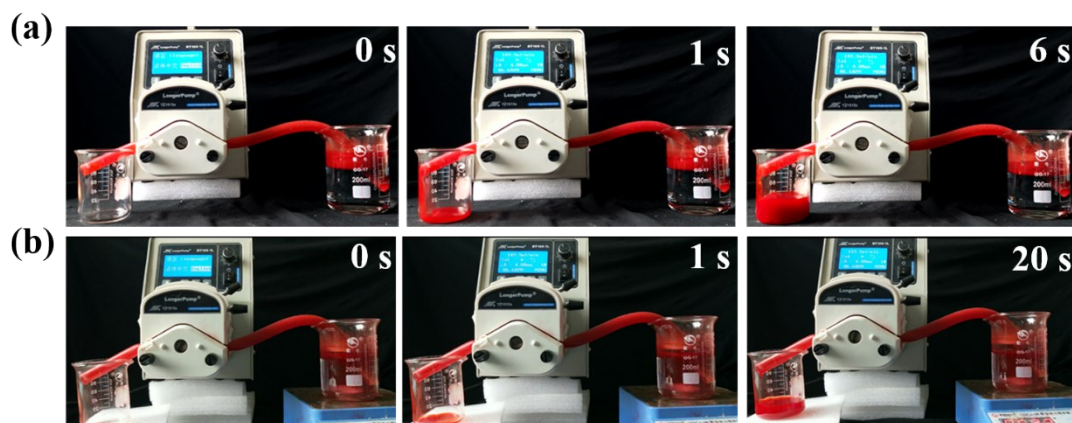

**Fig. S8** Continuous separation for static surface oil slick (a) and dynamic surface oil slick (b) over PU-PTMG

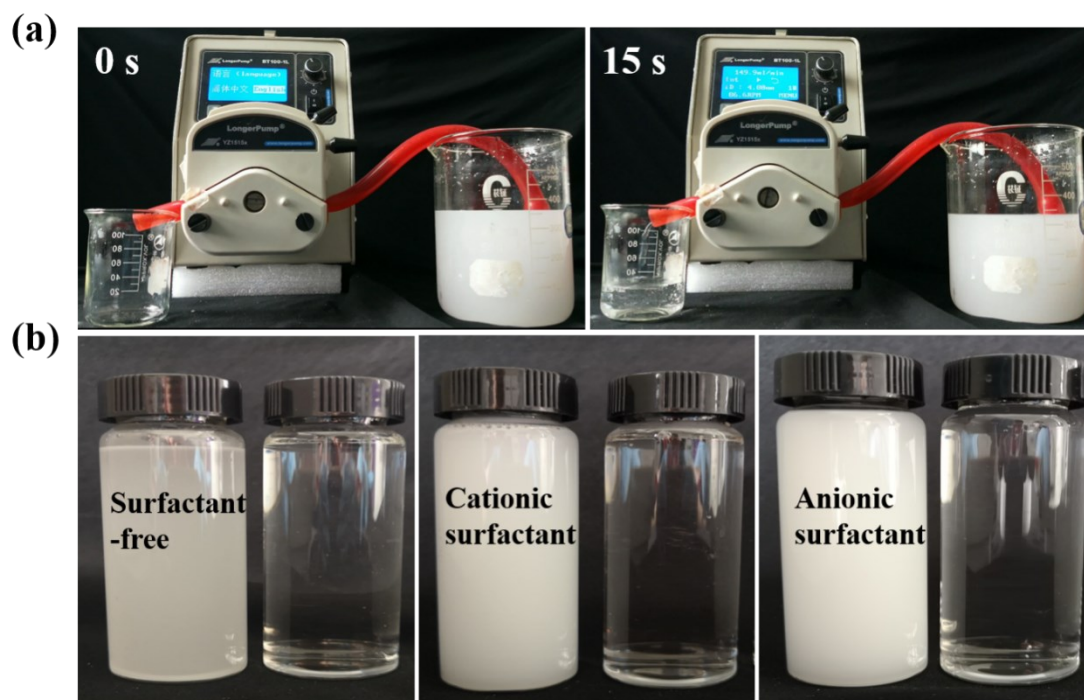

**Fig. S9** Continuous separation for emulsion (a), the comparison diagram before and after separation over PU-PTMG (b)

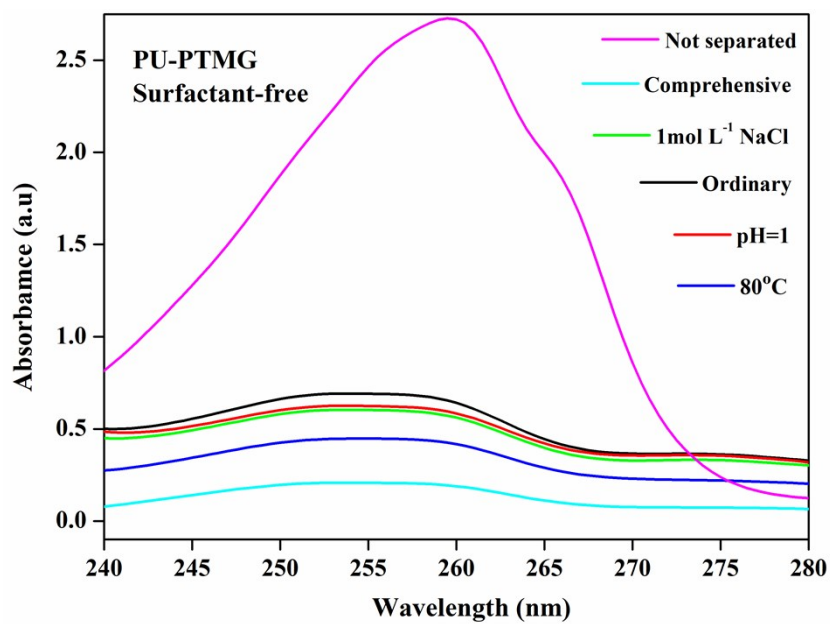

**Fig. S10** UV test chart of surfactant-free emulsion after separation by PU-PTMG under different conditions

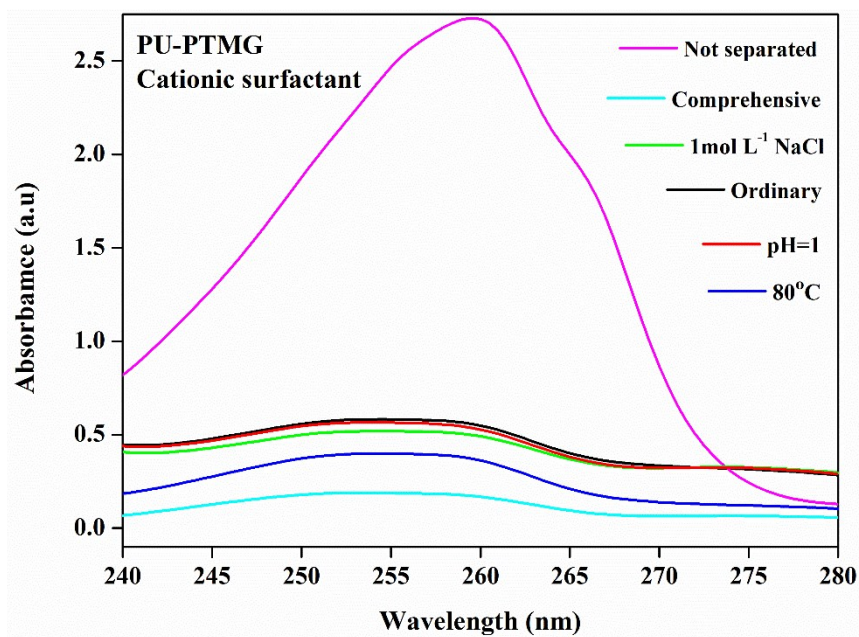

**Fig. S11** UV test chart of cationic surfactant stabilized emulsion after separation by PU-PTMG under different conditions



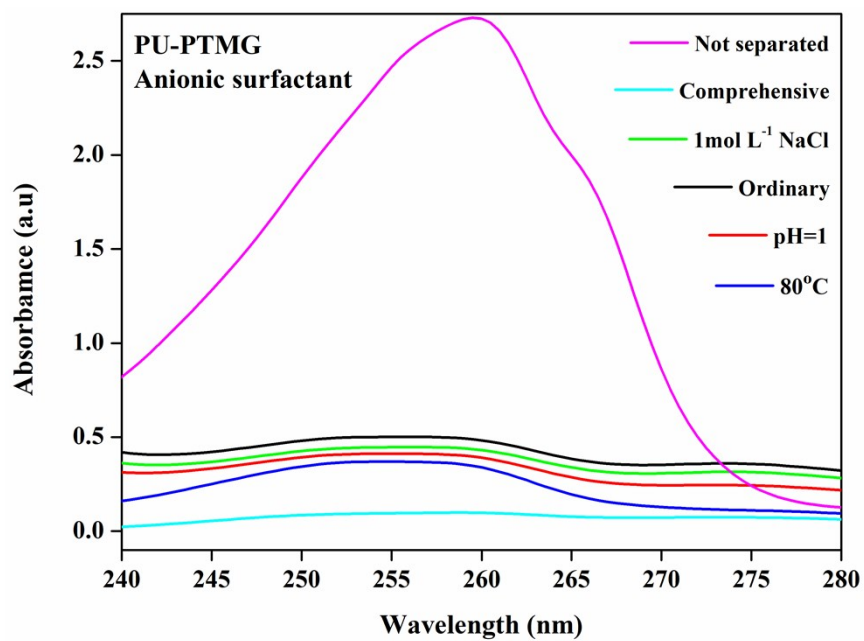

**Fig. S12** UV test chart of anionic surfactant stabilized emulsion after separation by PU-PTMG under different conditions

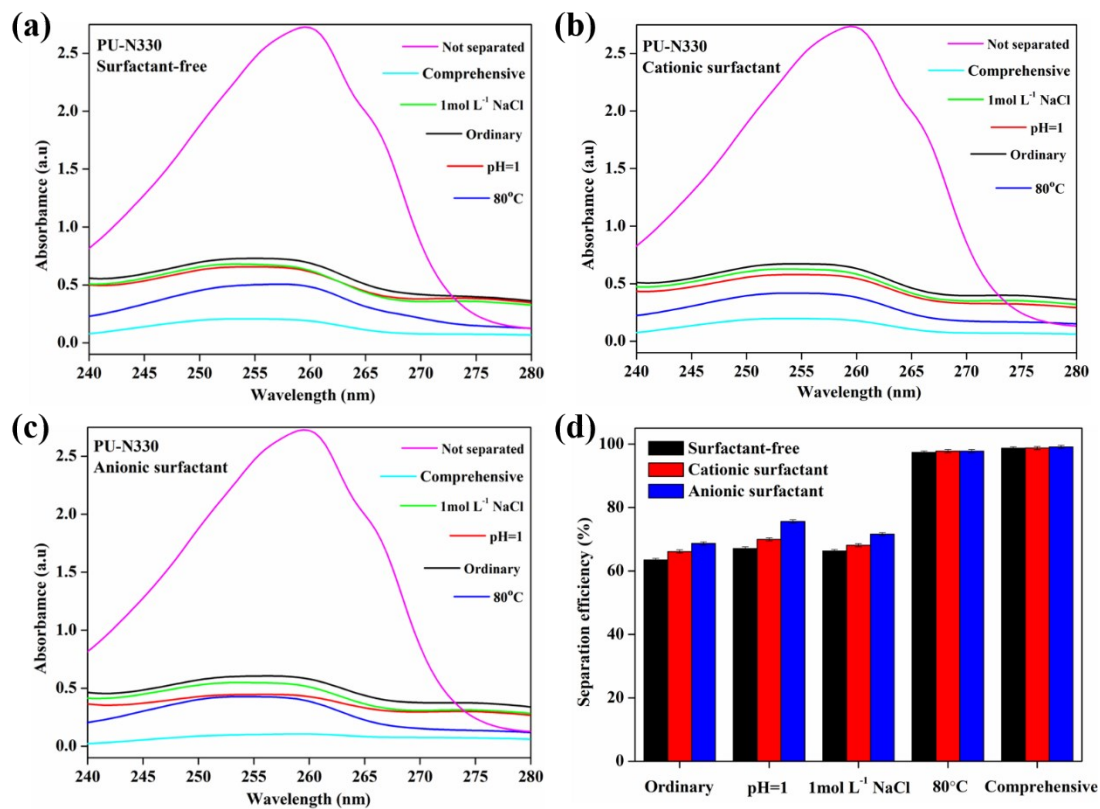

**Fig. S13** UV test charts of surfactant-free emulsion (a), cationic surfactant stabilized emulsion (b), anion surfactant stabilized emulsion (c) and the separation efficiencies of emulsions (d) by PU-N330 under different conditions

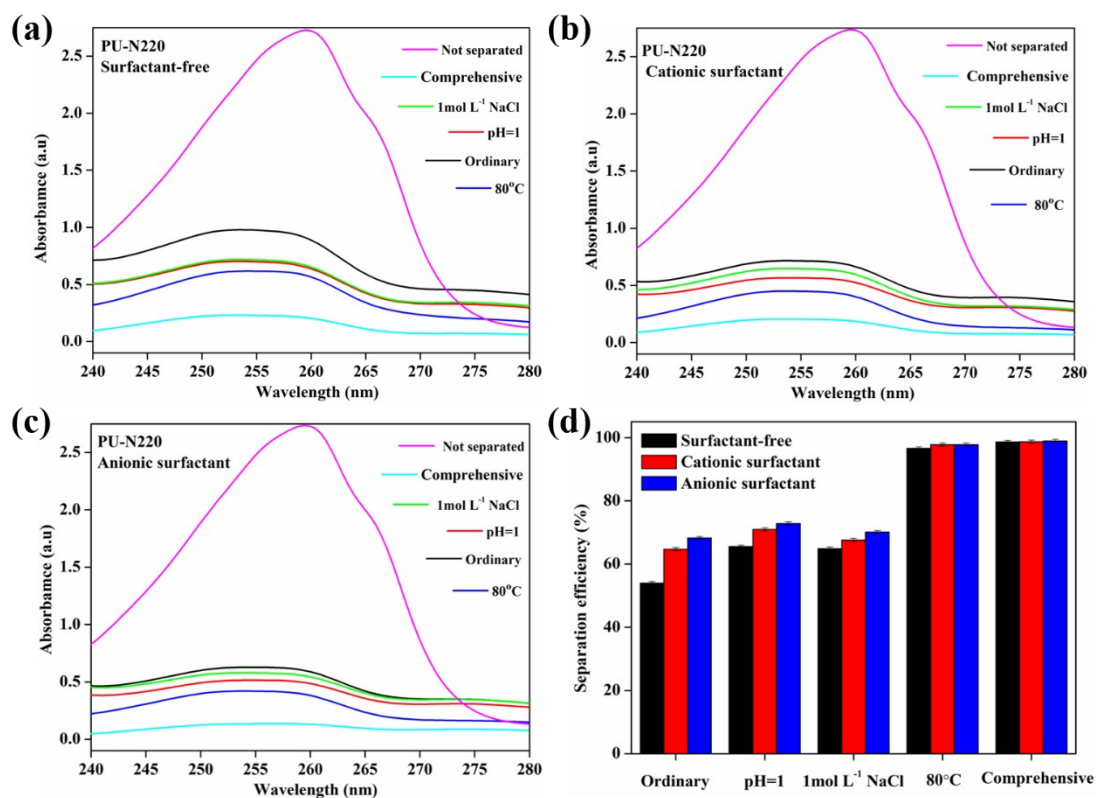

**Fig. S14** UV test charts of surfactant-free emulsion (a), cationic surfactant stabilized emulsion (b), anion surfactant stabilized emulsion (c) and the separation efficiencies of emulsions (d) by PU-N220 under different conditions

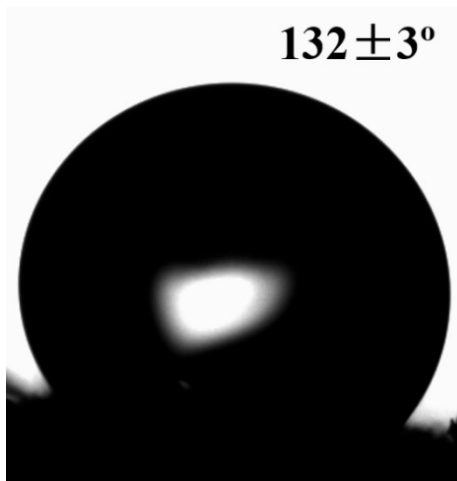

**Fig. S15** Water contact angle of block polyurethane foam

## References

- 1 F. Qiang, L. L. Hu, L. X. Gong, L. Zhao, S. N. Li, L. C. Tang, *Chem. Eng.J.*, 2017, **334**, 2154-2166.
- 2 H. Y. Wang, E. Q. Wang, Z. J. Liu, D. Gao, R.X. Yuan, L. Y. Sun and Y. J. Zhu, *J. Mater. Chem. A.*, 2015, **3**, 266-273
- 3 Q. Wei, O. Oribayo, X. S. Feng, G. L. Rempel and Q. M. Pan, *Ind. Eng. Chem. Res.*, 2018, **57**, 8918-8926
- 4 B. Li, X. Liu, X. Zhang, J. Zou, W. Chai and Y. Lou, *J Chem Technol Biot*, 2015, **90**, 2106-2112
- 5 X. T. Zhang, D. Y. Liu, Y. L. Ma, J. Nie and G. X. Sui, *Appl. Surf. Sci.*, 2017, **422**, 116-124
- 6 O. Oribayo, X. S. Feng, G. L. Rempel and Q. M. Pan, *Chem. Eng.J.*, 2017, **323**, 191-202
- 7 M.Khosravi and S. Azizian, *ACS Appl. Mater. Interfaces*, 2015, **7**, 25326-25333
- 8 T. Zhang, L. Y. Kong, M. Y. Zhang, F. X. Qiu, J. Rong and J. M. Pan, *RSC Adv.*, 2016, **6**, 86510-86519
